# Supplementary material for: Molten salt synthesis of tin doped hematite nanodiscs and their enhanced electrochemical performance for Li-ion batteries
Source: Royal Society of Chemistry journal article supplement (doi:10.1039/c4ra04577g), 2014-01-01
Supplement: c4ra04577g1.pdf [file c4ra04577g1.pdf]

## Molten salt synthesis of tin doped hematite nanodiscs and their enhanced electrochemical performance for Li-ion batteries

Rencheng Jin,<sup>a\*</sup> LiXia Yang,<sup>a</sup> Guihua Li,<sup>a</sup> and Gang Chen<sup>b</sup>

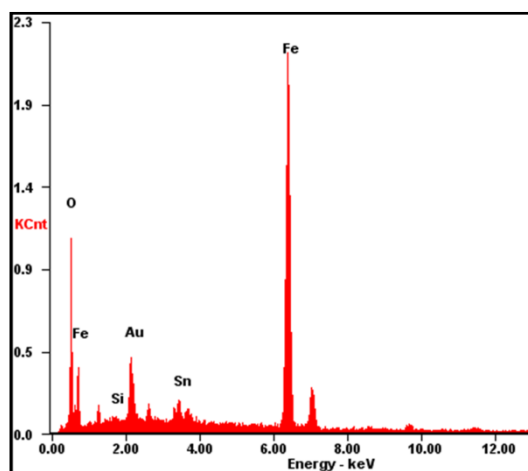

Fig. S1 EDS pattern of the Sn<sup>4+</sup> doped Fe<sub>2</sub>O<sub>3</sub> nanodiscs.
